# Supplementary material for: Macrophage metabolic regulation by phosphoglucomutase 1 shapes the host immune response in pneumococcal meningitis
Source: Research Square preprint supplement (doi:10.21203/rs.3.rs-8319354/v1), 2025-12-22
Supplement: Supplementary file 1 [file 31aa5f4b7da85eedd0753678.pdf]

## **SUPPLEMENTARY INFORMATION**

**Macrophage metabolic regulation by phosphoglucomutase 1 shapes the host immune response in pneumococcal meningitis**

## **TABLE OF CONTENTS**

## **SUPPLEMENTARY FIGURES**

## **SUPPLEMENTARY TABLES**

# SUPPLEMENTARY FIGURES

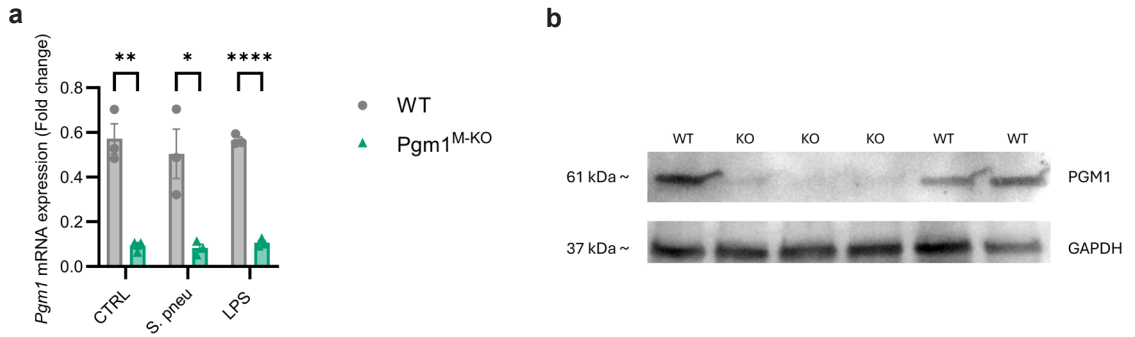

**Supplementary Figure 1. Validation of *Pgm1* knockdown in bone marrow-derived macrophages.** Knockdown of *Pgm1* was validated at the mRNA and protein levels in BMDMs derived from wild-type (WT) and *Pgm1*<sup>M-KO</sup> mice. **(a)** *Pgm1* mRNA expression in untreated BMDMs (CTRL), BMDMs infected with *S. pneumoniae* (MOI 1) and BMDMs stimulated with LPS (10 ng/mL) for 4 hours. **(b)** Western blot showing PGM1 protein expression in unstimulated wild type (WT) and *Pgm1*<sup>M-KO</sup> (KO) BMDMs with GAPDH used as a loading control. Data are shown as mean  $\pm$  SEM. N = 3 mice per genotype. Group differences were assessed using a two-sided t test. \*, p-value < 0.05; \*\*, p-value < 0.01; \*\*\*, p-value < 0.001; \*\*\*\*, p-value < 0.0001. BMDMs, bone marrow-derived macrophages; MOI, multiplicity of infection; LPS, lipopolysaccharide; SEM, standard error of the mean.

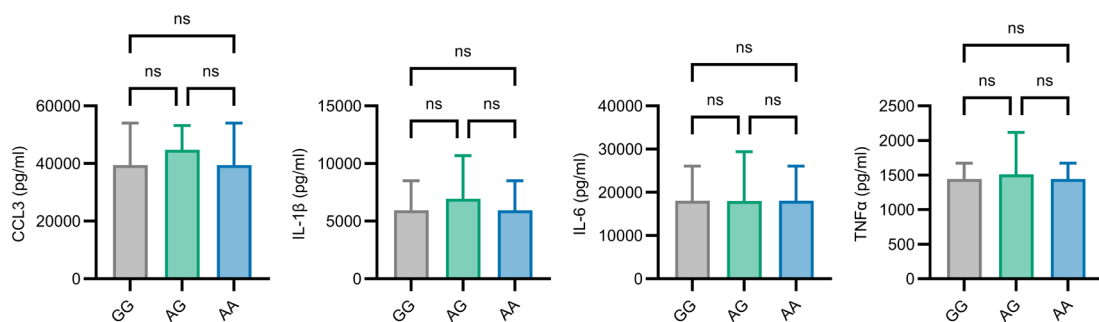

**Supplementary Figure 2. PBMC cytokine production after LPS stimulation is not influenced by rs12081070 genotype.** Cytokine concentrations in supernatants of PBMCs after 24 hours of stimulation with LPS (10 ng/mL). PBMCs were harvested from patients with the GG (N = 19), AG (N = 38) or AA (N = 14) genotype, one to five years after they were hospitalized for pneumococcal meningitis. LPS, lipopolysaccharide; PBMC, peripheral blood mononuclear cell. Data are presented as median with interquartile range. Group differences are calculated with a Kruskal-Wallis test followed by a post-hoc two-sided Dunn's test. Ns, non-significant. PBMC, peripheral blood mononuclear cells; LPS, lipopolysaccharide.

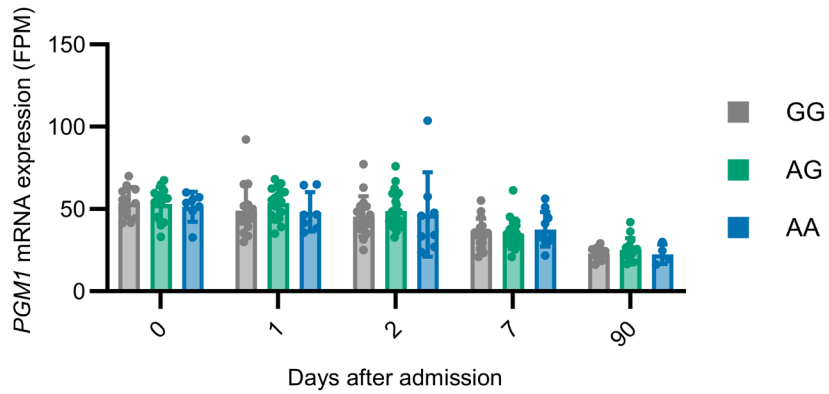

**Supplementary Figure 3. *PGM1* gene expression in whole blood of pneumococcal meningitis patients is not associated with rs12081070 genotype.** *PGM1* fragments per million (FPM) in whole blood of patients with pneumococcal meningitis at days 0 (N = 7 AA, 13 AG, 12 GG), 1 (N = 7 AA, 18 AG, 16 GG), 2 (N = 8 AA, 24 AG, 17 GG), 7 (N = 10 AA, 19 AG, 16 GG), and 90 (n = 4 AA, 15 AG, 10 GG) after hospital admission, stratified by rs12081070 genotype. No significant differences in expression were observed between genotypes at any time point. Data are presented as median with interquartile range. Group differences were assessed using a Kruskal-Wallis test followed by a post-hoc two-sided Dunn's test.

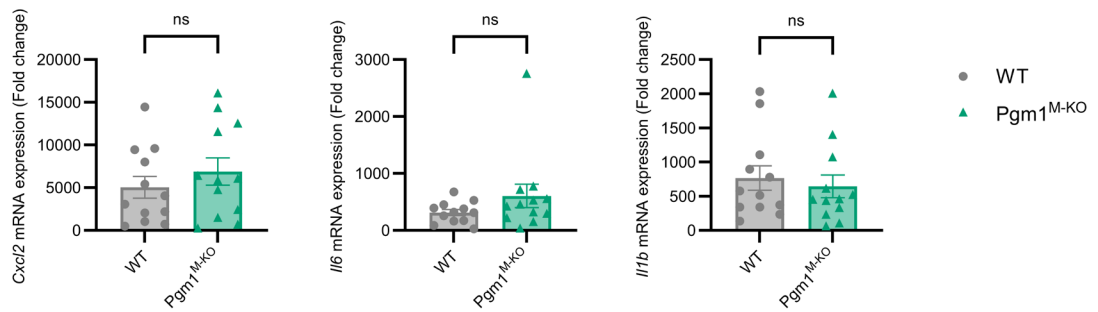

**Supplementary Figure 4. Cytokine gene expression in the brain is not influenced by Pgm1 during murine pneumococcal meningitis.** Gene expression was determined in the brain wild-type (WT) and *Pgm1* knockdown (*Pgm1<sup>M-KO</sup>*) mice, 20 hours after intracisternal infection with *S. pneumoniae*. Expression of *Cxcl2*, *Il6* and *Il1b* were determined by qPCR in 12 mice per group. All data was normalized against the average data of uninfected wild type-mice. Values from individual mice are shown with the mean ± SEM. Group differences were assessed using a two-sided t-test. BMDMs, bone marrow-derived macrophages; MOI, multiplicity of infection; LPS, lipopolysaccharide; SEM, standard error of the mean; Ns, non-significant.

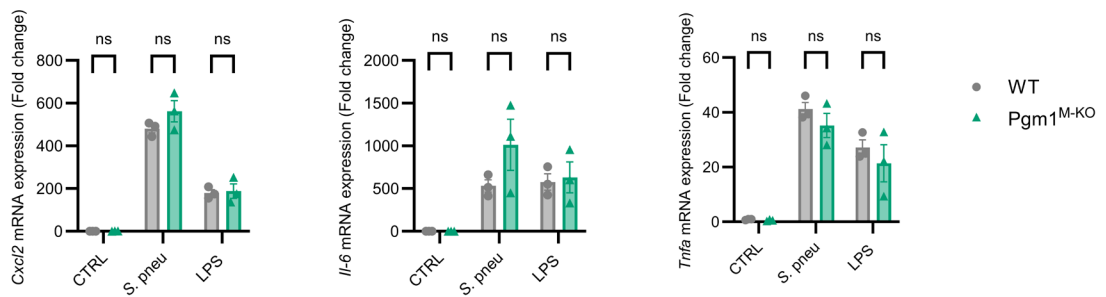

**Supplementary Figure 5. Cytokine gene expression in bone marrow-derived macrophages is not influenced by *Pgm1*.** Gene expression of *Cxcl2*, *Il6* and *Tnfa* in untreated BMDMs, and BMDMs infected with *S. pneumoniae* (MOI 1) or stimulated with LPS (10 ng/mL) for 24 hours. Gene expression was determined by qPCR. All data was normalized against the average data of unstimulated wild type mice. Data are shown as mean  $\pm$  SEM. N = 3 mice per genotype. Group differences were assessed using a two-sided t test. BMDMs, bone marrow-derived macrophages; MOI, multiplicity of infection; LPS, lipopolysaccharide; SEM, standard error of the mean; Ns, non-significant.

**Supplementary Table 1.** Clinical severity score for murine pneumococcal meningitis

| Code                                 | Item                                       | Score |
|--------------------------------------|--------------------------------------------|-------|
| <b>Appearance</b>                    |                                            |       |
| Weight loss                          |                                            |       |
| 1                                    | < 5% weight loss                           | 1     |
| 2                                    | 5-10% weight loss                          | 2     |
| 3                                    | 11-15% weight loss                         | 3     |
| 4                                    | 16-20% weight loss                         | 4     |
| 5                                    | ≥20% weight loss                           | HEP   |
| Posture                              |                                            |       |
| 1                                    | Slightly hunched back                      | 1     |
| 2                                    | Severe hunched back                        | 2     |
| Coat                                 |                                            |       |
| 1                                    | Diminished/lack grooming                   | 1     |
| 2                                    | Piloerection                               | 1     |
| 3                                    | Combination 1+2                            | 2     |
| Eyes                                 |                                            |       |
| 1                                    | Discharge from the eyes                    | 1     |
| 2                                    | Closed eyelids                             | 1     |
| 3                                    | Protruding eyes                            | 1     |
| 4                                    | Combination 1+2                            | 2     |
| 5                                    | Combination 1+3                            | 2     |
| <b>Behaviour</b>                     |                                            |       |
| Activity                             |                                            |       |
| 1                                    | Diminished activity                        | 2     |
| 2                                    | Inactive                                   | 3     |
| 3                                    | Increased activity / aggressive behaviour  | 1     |
| Condition                            |                                            |       |
| 1                                    | Within 5 sec to right when placed on back  | 2     |
| 2                                    | Within 30 sec to right when placed on back | 4     |
| 3                                    | Inability to right after placing on back   | HEP   |
| 4                                    | Coma                                       | HEP   |
| <b>Body function</b>                 |                                            |       |
| Respiration                          |                                            |       |
| 1                                    | Laboured breathing                         | 2     |
| 2                                    | Irregular breathing,                       | 2     |
| 3                                    | Combination 1+2                            | 4     |
| <b>Procedure-specific indicators</b> |                                            |       |
| Neurologic score                     |                                            |       |
| 1                                    | Paresis                                    | 2     |
| 2                                    | Coordination problem (including circling)  | 2     |
| 3                                    | (Partial) seizure                          | 2     |
| 4                                    | Combination 1+2                            | 4     |
| 5                                    | Combination 1+3                            | 4     |
| 6                                    | Combination 2+3                            | 4     |
| 7                                    | Combination 1+2+3                          | 6     |
| 8                                    | Paralysis                                  | HEP   |
| 9                                    | Seizure > 5 minutes                        | HEP   |
| 10                                   | ≥ 2 seizures in 15 min                     | HEP   |

HEP, humane endpoint

**Supplementary Table 2.** Histopathological scoring method of brain tissue in bacterial meningitis mouse model.

| Main category            | Subcategory                           | Score  |                                                          |                                                                                                                                                         |                                                                                              |
|--------------------------|---------------------------------------|--------|----------------------------------------------------------|---------------------------------------------------------------------------------------------------------------------------------------------------------|----------------------------------------------------------------------------------------------|
|                          |                                       | 0      | 1                                                        | 2                                                                                                                                                       | 3                                                                                            |
| Meningeal infiltration   |                                       | Absent | Focal mild infiltration                                  | Multifocal mild or focal severe infiltration                                                                                                            | Multifocal severe infiltration                                                               |
| Parenchymal infiltration |                                       | Absent | Focal mild infiltration                                  | Multifocal mild or focal severe infiltration                                                                                                            | Multifocal severe infiltration                                                               |
| Vascular inflammation    | Large meningeal artery inflammation   | Absent | Focal mild subendothelial infiltration /reactive changes | Multifocal mild subendothelial infiltration /reactive changes or focal severe vascular wall infiltration with obstruction and/or destruction of vessels | Multifocal severe vascular wall infiltration with obstruction and/or destruction of vessels  |
|                          | Small parenchymal vessel inflammation |        |                                                          |                                                                                                                                                         |                                                                                              |
| Ventriculitis            |                                       | Absent | A few inflammatory cells in the ventricle                | Groups of inflammatory cells in the ventricle with/without ependymal infiltration                                                                       | Extension of inflammatory cells into the periventricular tissue                              |
| Hemorrhage               |                                       | Absent | Focal small damage                                       | Multifocal small or focal large damage                                                                                                                  | Multifocal large damages                                                                     |
| Thrombosis               |                                       | Absent | Focal mild with partial obstruction of vascular lumen    | Multifocal mild with partial obstruction of vascular lumen or focal severe with complete obstruction of vascular lumen and destruction of vessel wall   | Multifocal severe with complete obstruction of vascular lumen and destruction of vessel wall |
| Abscess                  |                                       | Absent | Focal small damage                                       | Multifocal small or focal large damage                                                                                                                  | Multifocal large damages                                                                     |



**Supplementary Table 3.** List of primers

| <b>Gene</b>    | <b>Organism</b>     | <b>5' forward primer</b> | <b>3' reverse primer</b> |
|----------------|---------------------|--------------------------|--------------------------|
| <i>Pgm1</i>    | <i>Mus musculus</i> | GAGCATCGTCTCTACCGTGG     | TAACCAGGCGACCAATCCCG     |
| <i>B-actin</i> | <i>Mus musculus</i> | GGCTGTATTCCCCTCCATCG     | CCAGTTGGTAACAATGCCA      |
| <i>Rpl13a</i>  | <i>Mus musculus</i> | GGGCAGGTTCTGGTATTGGAT    | GGCTCGGAAATGGTAGGGG      |
| <i>Il6</i>     | <i>Mus musculus</i> | TCTATACCACTTCACAAGTCGGA  | GAATTGCCATTGCACAACCTCTT  |
| <i>Tnfa</i>    | <i>Mus musculus</i> | CTGAACTTCGGGGTGATCGG     | GGCTTGTCACTCGAATTTTGAGA  |
| <i>Cxcl2</i>   | <i>Mus musculus</i> | AAGTTTGCCTTGACCTGAAG     | ATCAGGTACGATCCAGGCTTC    |
| <i>Il1β</i>    | <i>Mus musculus</i> | GCCACCTTTTGACAGTGATGA    | AAGCTGGATGCTCTCATCAGG    |
| <i>Erdr1</i>   | <i>Mus musculus</i> | CGGTCAAGATGTTCACCCG      | GCTTCTACGTGTGTGCTTTCG    |

## SUPPLEMENTARY TABLES

**Supplementary Table 4:** Clinical characteristics of patients included in the Recall cohort compared to all pneumococcal meningitis patients

| Characteristic                       | Included<br>N = 71 | Not included<br>N = 1,129 | p-value |
|--------------------------------------|--------------------|---------------------------|---------|
| Age – years <sup>a</sup>             | 61 (54-64)         | 61 (51-69)                | 0.44    |
| Female sex                           | 35/71 (49%)        | 578/1,129 (51%)           | 0.81    |
| Immunocompromised state <sup>b</sup> | 14/71 (20%)        | 299/1,129 (26%)           | 0.26    |
| rs12081070 genotype                  |                    |                           | 0.76    |
| GG                                   | 19/71 (27%)        | 348/1,129 (31%)           |         |
| AG                                   | 38/71 (54%)        | 578/1,129 (51%)           |         |
| AA                                   | 14/71 (20%)        | 203/1,129 (18%)           |         |
| Clinical symptoms                    |                    |                           |         |
| Temperature - °C <sup>c</sup>        | 39.2 (37.9-39.7)   | 39.0 (38.0-39.7)          | 0.69    |
| GCS score <sup>d</sup>               | 12 (10-13)         | 11 (9-13)                 | 0.054   |
| Altered mental status (<14)          | 54/70 (77%)        | 869/1,128 (77%)           | >0.99   |
| Coma (<8)                            | 8/70 (11%)         | 263/1,128 (23%)           | 0.019   |
| Outcome                              |                    |                           |         |
| Unfavourable outcome                 | 17/71 (24%)        | 357/1,129 (32%)           | 0.19    |
| Mortality                            | 0/71 (0%)          | 87/1,129 (8%)             | 0.008   |
| Hearing impairment                   | 4/66 (6%)          | 52/977 (5%)               | 0.78    |
| Cognitive impairment                 | 12/57 (21%)        | 202/888 (23%)             | 0.92    |
| Cranial nerve palsy                  | 3/62 (5%)          | 52/935 (6%)               | >0.99   |
| Focal cerebral deficits <sup>e</sup> | 5/64 (8%)          | 81/949 (9%)               | >0.99   |

Data presented as n/N (%) or median (IQR). Group differences were tested with a Fisher's exact test for categorical variables and a Mann–Whitney U test for continuous variables. Abbreviations: GCS, Glasgow Coma Scale; GOS. <sup>a</sup>Age is known for all patients.

<sup>b</sup>Immunocompromised state is defined as active cancer, diabetes, alcoholism, immunosuppressive treatment, splenectomy or HIV.

<sup>c</sup>Temperature is known in 69 episodes included the in Recall study and in 110+ episodes not included. <sup>d</sup>GCS is known in 69 episodes included the in Recall study and in 1128 episodes not included. <sup>e</sup>Focal cerebral deficits are defined as aphasia or mono-or hemiparesis

**Supplementary Table 5:** Clinical characteristics of patients included in the SMS cohort compared to all pneumococcal meningitis patients

| Characteristic                       | Not included<br>N = 65 | Included<br>N = 1135 | p-value |
|--------------------------------------|------------------------|----------------------|---------|
| Age – years <sup>a</sup>             | 63 (54-70)             | 61 (51-68)           | 0.32    |
| Female sex                           | 28/65 (43%)            | 585/1,135 (52%)      | 0.20    |
| Immunocompromised state <sup>b</sup> | 18/65 (28%)            | 295/1,135 (26%)      | 0.77    |
| Genotype rs12081070                  |                        |                      | 0.62    |
| GG                                   | 23/65 (35%)            | 344/1,135 (30%)      |         |
| AG                                   | 30/65 (46%)            | 586/1,135 (52%)      |         |
| AA                                   | 12/65 (18%)            | 205/1,135 (18%)      |         |
| Clinical symptoms                    |                        |                      |         |
| Temperature - °C <sup>c</sup>        | 38.8 (37.8-39.4)       | 39.0 (38.0-39.7)     | 0.16    |
| GCS score <sup>d</sup>               | 11 (8-13)              | 11 (9-13)            | 0.48    |
| Altered mental status (<14)          | 50/65 (77%)            | 873/1,133 (77%)      | >0.99   |
| Coma (<8)                            | 19/65 (29%)            | 252/1,133 (22%)      | 0.22    |
| Outcome                              |                        |                      |         |
| Unfavourable outcome                 | 28/65 (43%)            | 346/1,135 (30%)      | 0.039   |
| Mortality                            | 14/65 (22%)            | 73/1,135 (6%)        | <0.001  |
| Hearing impairment                   | 18/45 (40%)            | 373/992 (38%)        | 0.75    |
| Cognitive impairment                 | 8/38 (21%)             | 206/907 (23%)        | 0.019   |
| Cranial nerve palsy                  | 2/42 (5%)              | 53/955 (6%)          | >0.99   |
| Focal cerebral deficits <sup>e</sup> | 5/41 (12%)             | 81/972 (8%)          | 0.39    |

Data presented as n/N (%) or median (IQR). Group differences were tested with a Fisher's exact test for categorical variables and a Mann–Whitney U test for continuous variables. Abbreviations: GCS, Glasgow Coma Scale; GOS. <sup>a</sup>Age is known for all patients.

<sup>b</sup>Immunocompromised state is defined as active cancer, diabetes, alcoholism, immunosuppressive treatment, splenectomy or HIV.

<sup>c</sup>Temperature is known in 63 episodes included the in SMS study and in 1112 episodes not included. <sup>d</sup>GCS is known in 65 episodes included the in SMS study and in 1133 episodes not included. <sup>e</sup>Focal cerebral deficits are defined as aphasia or mono-or hemiparesis
